# Supplementary material for: Two pairs of isomorphism and two 3D metal–organic frameworks based on a star-like ligand tri(4-pyridylphenyl)amine
Source: Royal Society of Chemistry journal article supplement (doi:10.1039/c3ce41694a), 2013-10-25
Supplement: c3ce41694a.pdf [file c3ce41694a.pdf]

## Two pairs of isomorphism and two 3D metal-organic frameworks based on a star-like ligand tri(4-pyridylphenyl)amine

Fandian Meng, Ling Qin, Mingdao Zhang, Hegen Zheng\*

*State Key Laboratory of Coordination Chemistry, School of Chemistry and Chemical Engineering, Nanjing National Laboratory of Microstructures, Nanjing University, Nanjing 210093, P. R. China*

**Table S1.** Selected bond lengths (Å) and angles (deg) for compounds **1-6**.

| Compound 1      |            |                 |            |
|-----------------|------------|-----------------|------------|
| Cd(1)-O(1)      | 2.310(2)   | Cd(1)-O(2)      | 2.558(2)   |
| Cd(1)-N(2)      | 2.345(3)   | Cd(1)-N(3)      | 2.505(4)   |
| O(1)-Cd(1)-O(1) | 99.97(12)  | O(1)-Cd(1)-N(2) | 95.89(10)  |
| O(1)-Cd(1)-N(3) | 130.01(6)  | N(2)-Cd(1)-N(3) | 83.13(6)   |
| N(2)-Cd(1)-N(2) | 166.25(12) | O(1)-Cd(1)-O(2) | 53.13(8)   |
| O(2)-Cd(1)-N(2) | 87.98(9)   | O(2)-Cd(1)-N(3) | 76.93(6)   |
| O(2)-Cd(1)-O(2) | 153.86(11) |                 |            |
| Compound 2      |            |                 |            |
| Zn(1)-O(1)      | 2.112(5)   | Zn(1)-O(2)      | 2.359(5)   |
| Zn(1)-O(3)      | 2.013(4)   | Zn(1)-N(1)      | 2.082(4)   |
| Zn(1)-N(2)      | 2.067(4)   | O(3)-Zn(1)-N(2) | 105.57(19) |
| O(3)-Zn(1)-N(1) | 97.31(18)  | N(2)-Zn(1)-N(1) | 104.32(18) |
| O(3)-Zn(1)-O(1) | 105.35(19) | N(2)-Zn(1)-O(1) | 140.59(19) |
| N(1)-Zn(1)-O(1) | 95.33(18)  | O(3)-Zn(1)-O(2) | 156.63(18) |
| N(2)-Zn(1)-O(2) | 87.97(18)  | N(1)-Zn(1)-O(2) | 97.61(17)  |
| Compound 3      |            |                 |            |
| Co(1)-O(2)      | 2.081(2)   | Co(1)-N(1)      | 2.099(2)   |

|                   |            |                 |            |
|-------------------|------------|-----------------|------------|
| Co(1)-O(1)        | 2.230(2)   | O(2)-Co(1)-O(2) | 154.73(12) |
| O(2)-Co(1)-N(1)   | 102.78(9)  | N(1)-Co(1)-N(1) | 92.78(13)  |
| O(2)-Co(1)-O(1)   | 99.54(8)   | N(1)-Co(1)-O(1) | 93.61(9)   |
| <b>Compound 4</b> |            |                 |            |
| Zn(1)-O(1)        | 2.017(3)   | Zn(1)-N(1)      | 2.097(3)   |
| Zn(1)-O(2)        | 2.439(4)   | O(1)-Zn(1)-O(1) | 143.3(2)   |
| O(1)-Zn(1)-N(1)   | 106.89(13) | N(1)-Zn(1)-N(1) | 94.49(18)  |
| N(1)-Zn(1)-O(2)   | 93.42(12)  | O(2)-Zn(1)-O(2) | 82.71(16)  |
| <b>Compound 5</b> |            |                 |            |
| Co(1)-O(2)        | 2.016(2)   | Co(1)-O(3)      | 2.384(3)   |
| Co(1)-O(4)        | 1.925(2)   | Co(1)-N(2)      | 2.064(2)   |
| Co(1)-N(3)        | 2.055(2)   | O(4)-Co(1)-O(2) | 98.10(11)  |
| O(4)-Co(1)-N(3)   | 97.61(11)  | O(2)-Co(1)-N(2) | 103.86(10) |
| N(3)-Co(1)-N(2)   | 112.89(10) | O(4)-Co(1)-O(3) | 151.17(10) |
| O(2)-Co(1)-O(3)   | 58.90(10)  | N(3)-Co(1)-O(3) | 85.23(10)  |
| N(2)-Co(1)-O(3)   | 86.45(9)   |                 |            |
| <b>Compound 6</b> |            |                 |            |
| Cd(1)-O(3)        | 2.172(5)   | Cd(1)-N(1)      | 2.271(4)   |
| Cd(1)-N(2)        | 2.309(4)   | Cd(1)-O(1)      | 2.357(4)   |
| Cd(1)-O(2)        | 2.392(4)   | O(3)-Cd(1)-N(1) | 143.85(19) |
| O(3)-Cd(1)-N(2)   | 90.25(17)  | N(1)-Cd(1)-N(2) | 113.31(16) |
| O(3)-Cd(1)-O(1)   | 91.50(16)  | N(1)-Cd(1)-O(1) | 90.24(16)  |
| N(2)-Cd(1)-O(1)   | 134.91(18) | O(3)-Cd(1)-O(2) | 124.65(18) |
| N(1)-Cd(1)-O(2)   | 84.98(15)  | N(2)-Cd(1)-O(2) | 87.75(15)  |
| O(1)-Cd(1)-O(2)   | 55.22(16)  |                 |            |

### Powder X-ray diffraction patterns of compound 1-6

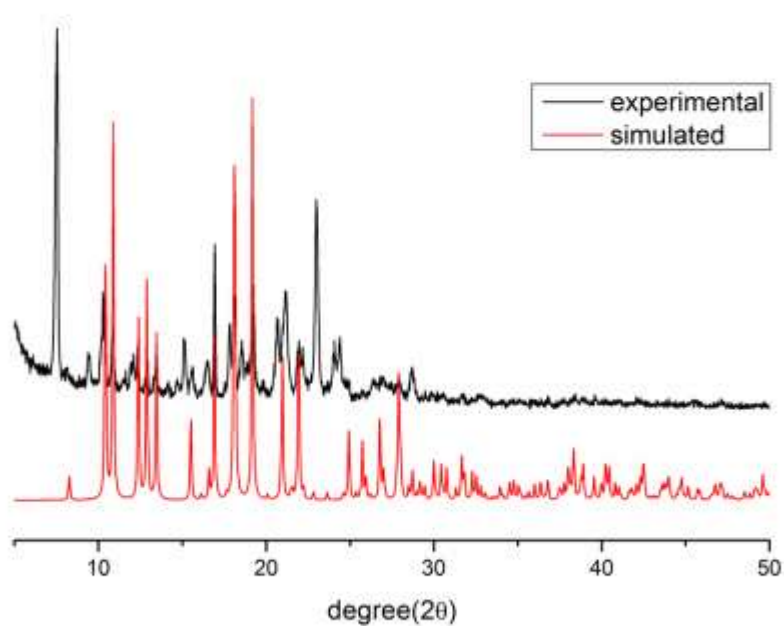

**Fig. S1.** Powder X-ray diffraction patterns of compound 1

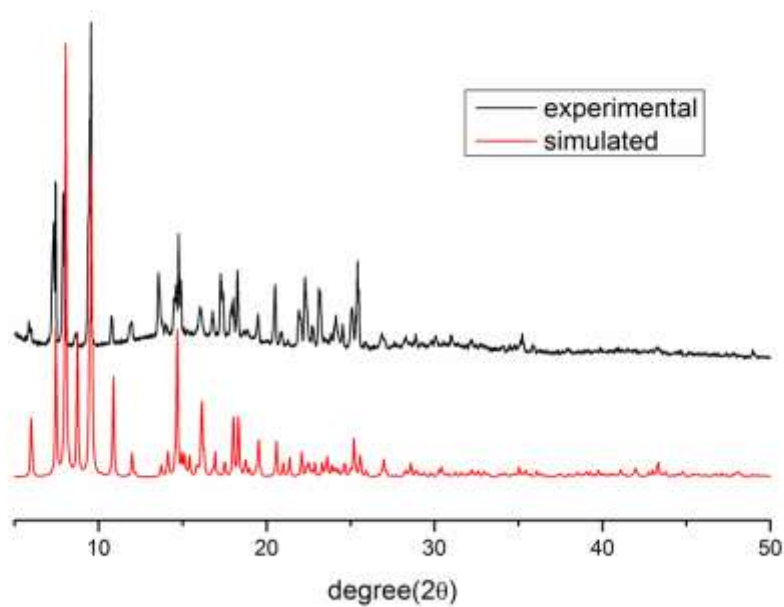

**Fig. S2.** Powder X-ray diffraction patterns of compound 2

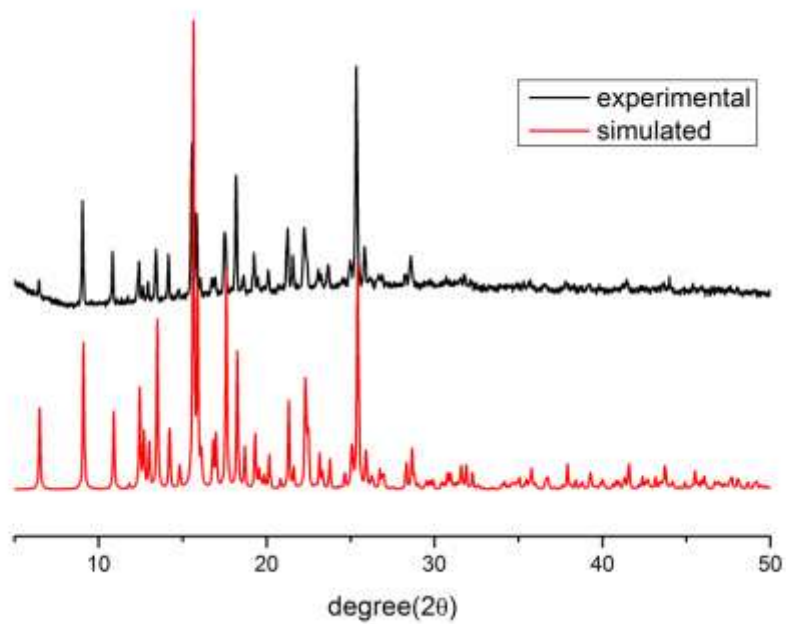

**Fig. S3.** Powder X-ray diffraction patterns of compound **3**

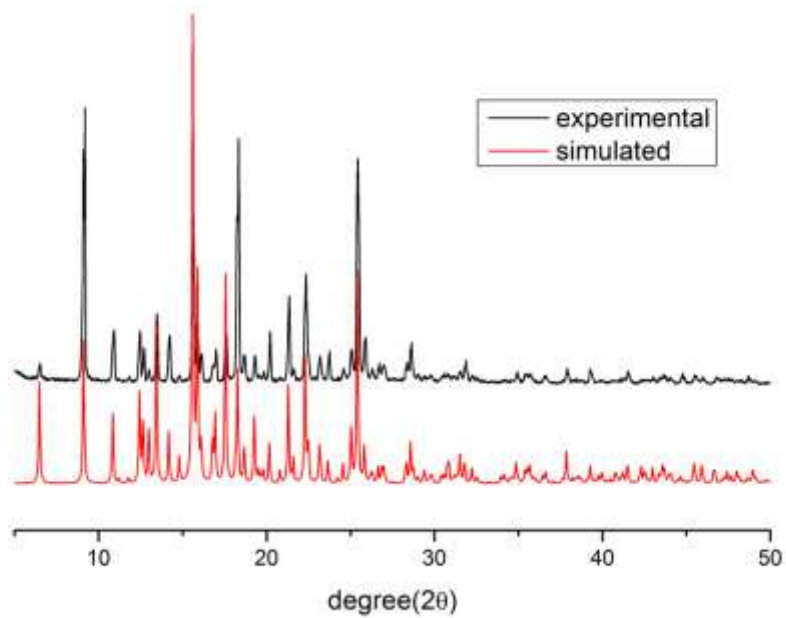

**Fig. S4.** Powder X-ray diffraction patterns of compound **4**

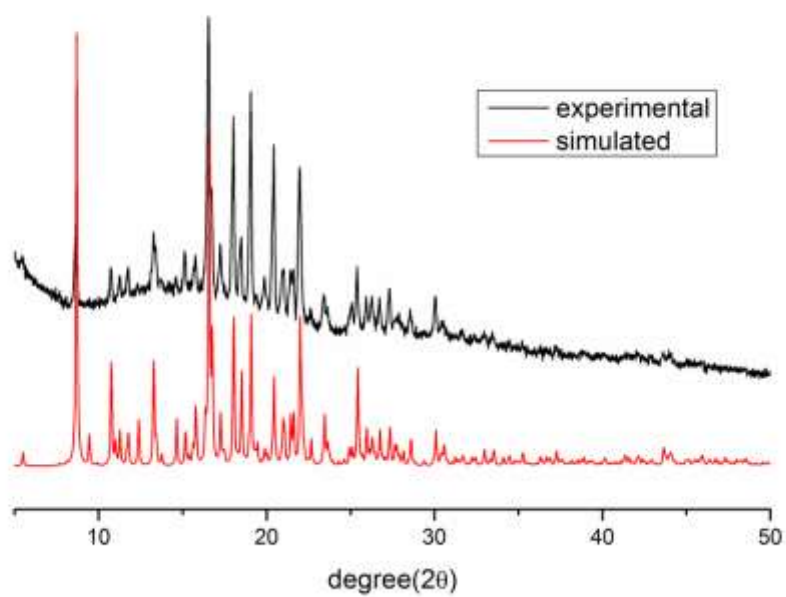

**Fig. S5.** Powder X-ray diffraction patterns of compound **5**

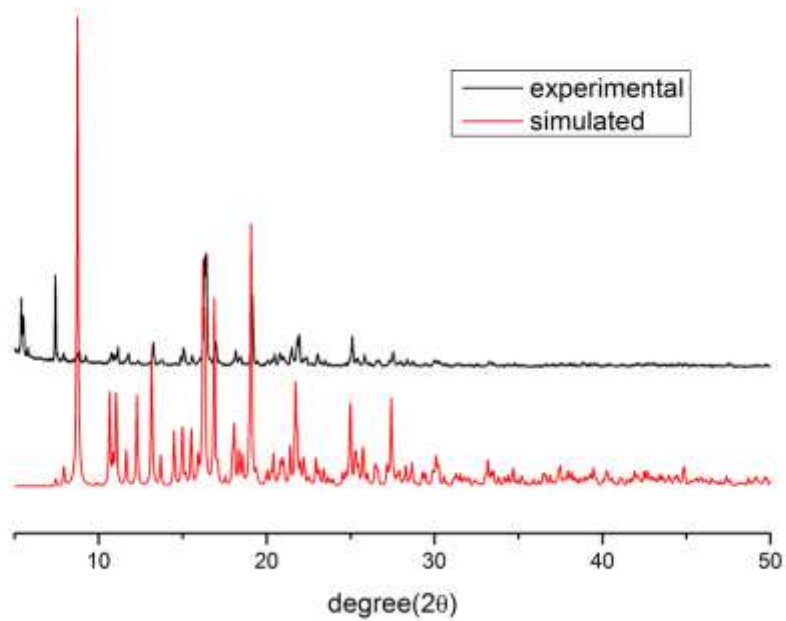

**Fig. S6.** Powder X-ray diffraction patterns of compound **6**

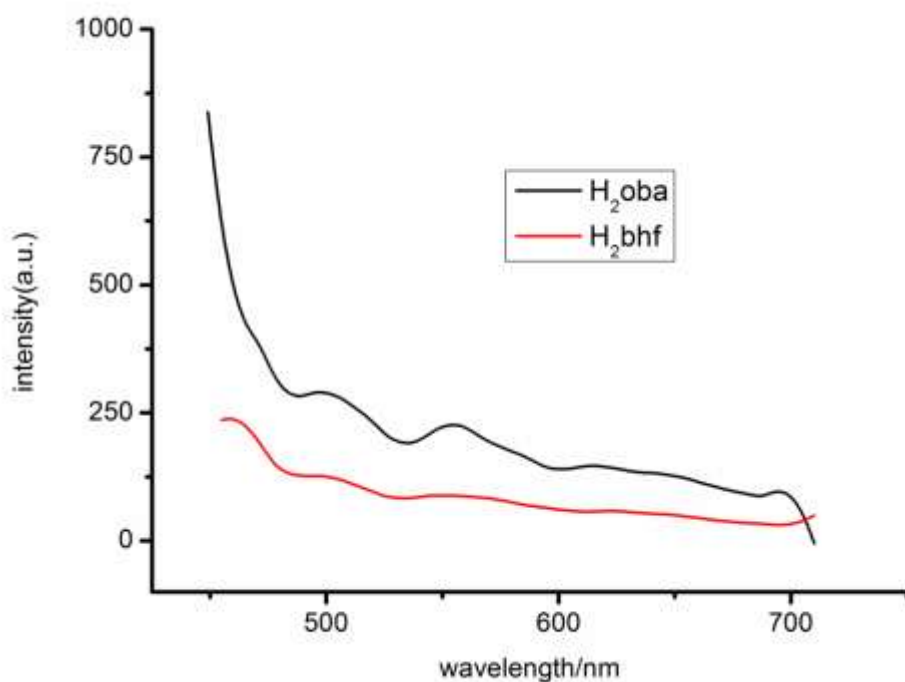

**Fig. S7.** Emission spectra of H<sub>2</sub>oba and H<sub>2</sub>bhf at room temperature.

### Results of IR analysis in KBr pullet

| Compound | IR (KBr)                                                                                                                                                                             |
|----------|--------------------------------------------------------------------------------------------------------------------------------------------------------------------------------------|
| <b>1</b> | 3420(s), 1593(s), 1516(s), 1487(m), 1332(m), 1284(m), 1236(w), 1188(w), 995(w), 811(m), 753(m), 559(w), 512(w)                                                                       |
| <b>2</b> | 3423(s), 3037(w), 2920(w), 2360(s), 1597(s), 1490(m), 1394(m), 1336(w), 1288(m), 1220(w), 1182(w), 1055(w), 1017(w), 882(w), 824(m), 746(w)                                          |
| <b>3</b> | 3426(s), 3039(w), 1683(m), 1623(m), 1589(s), 1484(m), 1415(w), 1356(m), 1297(m), 1227(s), 1167(w), 928(w), 840(m), 802(s), 725(m), 560(m)                                            |
| <b>4</b> | 3414(s), 3085(w), 3046(w), 1934(w), 1597(s), 1558(m), 1481(s), 1403(m), 1326(m), 1288(s), 1259(w), 1210(w), 1166(m), 1065(w), 968(w), 930(w), 843(m), 805(s), 727(m), 563(m), 505(m) |
| <b>5</b> | 3389(s), 3029(w), 1599(s), 1540(m), 1497(s), 1374(m), 1296(m), 1232(s), 1193(w), 833(m), 740(m), 575(w), 520(w)                                                                      |
| <b>6</b> | 3383(s), 3020(w), 1597(s), 1535(m), 1494(s), 1379(m), 1296(m), 1223(s), 1189(w), 1161(w), 1015(w), 891(w), 818(m), 746(m), 569(w), 517(w)                                            |

**Table S2** Results of IR analysis of compounds **1** to **6** in KBr pullet
